# Supplementary material for: Toxicology and Pharmacokinetics Study of Intradiscal Injection of Simvastatin in Rabbits
Source: PubMed Central journal article supplement (PMC8103611; doi:10.3389/fphar.2021.582309), 2021-04-23
Supplement: Datasheet1.pdf [file Datasheet1.pdf]

Supplementary Table S1 : The plasma samples were analyzed by liquid phase mass spectrometry. The pharmacokinetic parameters are determined based on the average concentration-time data in the research-oriented test drug. Use WinNonlin® Professional 6.3 non-isolated module to calculate parameters (drug peak concentration, peak time and final elimination rate, etc.). The calculation of PK parameters does not include any BLQ (10ng/mL) concentration.

#### LC-MS methods

| LC method (HPLC: Shimadzu LC20AD)                                                                                                                                                                                                                                                                                                                                                                                                                                                                   |                                      |                                        |       |                               |
|-----------------------------------------------------------------------------------------------------------------------------------------------------------------------------------------------------------------------------------------------------------------------------------------------------------------------------------------------------------------------------------------------------------------------------------------------------------------------------------------------------|--------------------------------------|----------------------------------------|-------|-------------------------------|
| Column:                                                                                                                                                                                                                                                                                                                                                                                                                                                                                             | Waters ACQUITY BEH C8 1.7um 2.1*50mm |                                        |       |                               |
| Mobile Phase:                                                                                                                                                                                                                                                                                                                                                                                                                                                                                       | A:                                   | 0.1% formic acid (FA) aqueous solution | B:    | 0.1% FA in acetonitrile (CAN) |
| HPLC Gradient                                                                                                                                                                                                                                                                                                                                                                                                                                                                                       |                                      |                                        |       |                               |
| Total time (min)                                                                                                                                                                                                                                                                                                                                                                                                                                                                                    | Flow rate (µL/min)                   | A (%)                                  | B (%) |                               |
| 0.01                                                                                                                                                                                                                                                                                                                                                                                                                                                                                                | 500                                  | 70                                     | 30    |                               |
| 0.3                                                                                                                                                                                                                                                                                                                                                                                                                                                                                                 | 500                                  | 70                                     | 30    |                               |
| 1.3                                                                                                                                                                                                                                                                                                                                                                                                                                                                                                 | 500                                  | 2                                      | 98    |                               |
| 2                                                                                                                                                                                                                                                                                                                                                                                                                                                                                                   | 500                                  | 2                                      | 98    |                               |
| 2.2                                                                                                                                                                                                                                                                                                                                                                                                                                                                                                 | 500                                  | 70                                     | 30    |                               |
| 2.7                                                                                                                                                                                                                                                                                                                                                                                                                                                                                                 | 500                                  | 70                                     | 30    |                               |
| Mass Spectrometer Conditions (Mass Spectrometer: API4000)                                                                                                                                                                                                                                                                                                                                                                                                                                           |                                      |                                        |       |                               |
| Ionization Mode:                                                                                                                                                                                                                                                                                                                                                                                                                                                                                    | ESI                                  |                                        |       |                               |
| Mass Spectrometer Conditions:                                                                                                                                                                                                                                                                                                                                                                                                                                                                       |                                      |                                        |       |                               |
| Compound ID:                                                                                                                                                                                                                                                                                                                                                                                                                                                                                        | Q1                                   | Q3                                     | DP    | CE                            |
| Dic                                                                                                                                                                                                                                                                                                                                                                                                                                                                                                 | 296                                  | 250.1                                  | 50    | 17                            |
| Simvastatin-1                                                                                                                                                                                                                                                                                                                                                                                                                                                                                       | 419.2                                | 199.5                                  | 100   | 15                            |
| Sample processing:                                                                                                                                                                                                                                                                                                                                                                                                                                                                                  |                                      |                                        |       |                               |
| For rabbit plasma samples: In an EP tube, 5 µL of duplicate samples, QC samples and rabbit plasma samples with 150 µL ACN (50 ng / mL propranolol and 200 ng / mL tolbutamide and 500 ng / mL diisopropylcarbodiimide). Vortex the mixture for 1 minute, centrifuge for 10 minutes (13,000 rpm, 4 ° C), transfer 50 µL of the supernatant to a 96-well plate containing 150 µL of pure water, shake for 10 minutes, and finally inject 10 µL into the liquid phase. Grade mass spectrometry system. |                                      |                                        |       |                               |

Supplementary Table S2 : Cerebrospinal fluid-liquid phase mass spectrometry. Rabbit cerebrospinal fluid before, 3h, 5h, 8h, 24h, 3, 7, 14 and 28 days after the operation were tested.

Cerebrospinal fluid-liquid phase mass spectrometry

---

|                                                                                                                                                                                                                                                                                                                                                                                                                                                                                                                                                        |                                     |                 |                  |
|--------------------------------------------------------------------------------------------------------------------------------------------------------------------------------------------------------------------------------------------------------------------------------------------------------------------------------------------------------------------------------------------------------------------------------------------------------------------------------------------------------------------------------------------------------|-------------------------------------|-----------------|------------------|
| HPLC:                                                                                                                                                                                                                                                                                                                                                                                                                                                                                                                                                  | Shimadzu LC20AD                     |                 |                  |
| Autosampler:                                                                                                                                                                                                                                                                                                                                                                                                                                                                                                                                           | CTC PAL                             |                 |                  |
| Mass Spectrometer:                                                                                                                                                                                                                                                                                                                                                                                                                                                                                                                                     | API4000                             |                 |                  |
|                                                                                                                                                                                                                                                                                                                                                                                                                                                                                                                                                        | LC Method                           |                 |                  |
| Column:                                                                                                                                                                                                                                                                                                                                                                                                                                                                                                                                                | Thermo Hypersil Gold 1.9um 50*2.1mm |                 |                  |
| Mobile Phase:                                                                                                                                                                                                                                                                                                                                                                                                                                                                                                                                          | A:                                  | 0.1%FA in water | B: 0.1%FA in ACN |
|                                                                                                                                                                                                                                                                                                                                                                                                                                                                                                                                                        | HPLC Gradient                       |                 |                  |
| Total Time(min)                                                                                                                                                                                                                                                                                                                                                                                                                                                                                                                                        | Flow Rate( $\mu$ L/min)             | A(%)            | B(%)             |
| 0.01                                                                                                                                                                                                                                                                                                                                                                                                                                                                                                                                                   | 500                                 | 70              | 30               |
| 0.30                                                                                                                                                                                                                                                                                                                                                                                                                                                                                                                                                   | 500                                 | 70              | 30               |
| 0.90                                                                                                                                                                                                                                                                                                                                                                                                                                                                                                                                                   | 500                                 | 40              | 60               |
| 2.00                                                                                                                                                                                                                                                                                                                                                                                                                                                                                                                                                   | 500                                 | 5               | 95               |
| 2.40                                                                                                                                                                                                                                                                                                                                                                                                                                                                                                                                                   | 500                                 | 5               | 95               |
| 2.50                                                                                                                                                                                                                                                                                                                                                                                                                                                                                                                                                   | 500                                 | 70              | 30               |
| 3.00                                                                                                                                                                                                                                                                                                                                                                                                                                                                                                                                                   | 500                                 | 70              | 30               |
|                                                                                                                                                                                                                                                                                                                                                                                                                                                                                                                                                        | Mass Spectrometer Conditions        |                 |                  |
| Ionization Mode:                                                                                                                                                                                                                                                                                                                                                                                                                                                                                                                                       | ESI                                 |                 |                  |
|                                                                                                                                                                                                                                                                                                                                                                                                                                                                                                                                                        | Mass Spectrometer Conditions:       |                 |                  |
| Compound ID:                                                                                                                                                                                                                                                                                                                                                                                                                                                                                                                                           | Q1                                  | Q3              | DP CE            |
| Tol                                                                                                                                                                                                                                                                                                                                                                                                                                                                                                                                                    | 271.0                               | 74.2            | 70 22            |
| Simvastatin-1                                                                                                                                                                                                                                                                                                                                                                                                                                                                                                                                          | 419.2                               | 199.5           | 100 15           |
|                                                                                                                                                                                                                                                                                                                                                                                                                                                                                                                                                        | Sample processing:                  |                 |                  |
| Rabbit cerebrospinal fluid samples: In an EP tube, duplicate samples of 10 $\mu$ L, duplicate QC samples and rabbit cerebrospinal fluid samples with 60 $\mu$ L ACN (50 ng/mL propranolol and 200 ng/mL tolbutamide and 500 ng/mL diisopropylcarbodiimide). Vortex the mixture for 1 minute, centrifuge for 10 minutes (13,000 rpm, 4 ° C), transfer 50 $\mu$ L of the supernatant to a 96-well plate containing 150 $\mu$ L of pure water, shake for 10 minutes, and finally inject 10 $\mu$ L into the liquid phase. Grade mass spectrometry system. |                                     |                 |                  |

---
